# Supplementary material
Source: publisher site journal article supplement (https://www.dovepress.com/article/596122)
Supplement: Supplementary file 1 [file 596122%20Supplementary_files.docx]

Supplementary Table 1. Variable Importance Ranking in the LightGBM Model for Predicting Postoperative Intracranial Infection (ICI)

| Rank | Variable Name | Variable Description | Importance Score |
| --- | --- | --- | --- |
| 1 | Postoperative cerebrospinal fluid (CSF) leakage | Postoperative occurrence of CSF leakage (confirmed by clinical observation, imaging examination, or lumbar puncture) | 100 |
| 2 | Frequent CSF sampling or drug injection via drainage tubes | ≥3 times of CSF sampling or drug injection through indwelling drainage tubes within 24 hours | 89.7 |
| 3 | Surgical duration | Total duration of craniotomy (measured in minutes from skin incision to suture completion) | 76.3 |
| 4 | Intraoperative blood loss | Total volume of blood loss during surgery (measured in milliliters) | 68.5 |
| 5 | Number of craniotomies ≥2 | Patients who underwent two or more craniotomy procedures | 57.2 |
